# Supplementary material for: Highly efficient, ultra-stable multi-interlayer luminescent solar concentrators based on green and red-emitting perovskite nanocrystal composites
Source: Royal Society of Chemistry journal article supplement (doi:10.1039/d4tc04167d), 2024-11-12
Supplement: d4tc04167d1.pdf [file d4tc04167d1.pdf]

**Supporting Information:**

**Highly efficient, ultra-stable multi-interlayer luminescent solar concentrators based on green and red-emitting perovskite nanocrystal composites**

*Changwen Li,<sup>#</sup> Yuxin Gao,<sup>#</sup> Zhiqiang Ren, Shoujun Xiong, Changwei Li, Jun Wu,\* Jinhua Li, Xianbao Wang,\* Jianying Wang\**

Key Laboratory for the Green Preparation and Application of Functional Materials, Ministry of Education, Collaborative Innovation Center for Advanced Organic Chemical Materials Co-constructed by the Province and Ministry, Hubei Key Laboratory of Polymer Materials, School of New Energy and Electrical Engineering, Hubei University, Wuhan 430062, P. R. China

\* Corresponding authors:

wangjy\_2002@hubu.edu.cn (J. Wang)

wujun@hubu.edu.cn (J. Wu)

wxb@hubu.edu.cn (X. Wang)

# These authors contribute to this work equally

## **Contents**

### **S1 Experimental Section**

#### **S1.1 Materials**

#### **S1.2 Synthesis of silica aerogels**

#### **S1.3 Synthesis of Zn-CsPbBr<sub>3</sub>@SiO<sub>2</sub> (ZB) composites**

#### **S1.4 Synthesis of Zn-CsPbBrI<sub>2</sub>@SiO<sub>2</sub> (ZBI) Composites**

#### **S1.5 Fabrication of LSCs**

### **S2 Characterization**

### **S3 Figures and tables**

### **S1 Experimental section**

#### **S1.1 Materials**

Tetraethyl orthosilicate (TEOS, AR), ammonia solution (NH<sub>3</sub>-H<sub>2</sub>O, 25-28 wt%), ethanol (EtOH, 99.7%), N-N dimethylamide (DMF, 99.5%), n-hexane (AR), concentrated hydrochloric acid (HCl, 36-38%), and dichloromethane (DCM, 99.5%) were purchased from Sinopharm Chemical Reagent Co. Ltd. Trimethylchlorosilane (TMCS, >98.0%) was purchased from Aladdin Reagent (Shanghai) Co. Lead bromide (PbBr<sub>2</sub>, 99.9%), cesium bromide (CsBr, 99.5%), zinc bromide (ZnBr<sub>2</sub>, 99.9%), and zinc iodide (ZnI<sub>2</sub>, 99.9%) were purchased from McLean Co. All basic components and curing agents of polydimethylsiloxane (PDMS Sylgard 184) were obtained from Dow Corning 184 Optical Adhesives, USA. All chemicals were used as is without further purification. All chemicals were used as received, without further purification and modification.

#### **S1.2 Synthesis of silica aerogels**

Silicon aerogels were synthesized as improved in previous publications.<sup>1</sup> The molar ratio of alcohol to TEOS was 4:1, the molar ratio of water to TEOS was 2.8, and the

concentration of HCl relative to water was 0.01 mol/L. The mixture was stirred for 8 hours. Under stirring, an ethanol solution of 10% vol. ammonia was added, and the pH was adjusted to 6-7. After aging at room temperature for 24 h, the wet gel showed a light blue color, and n-hexane was added to replace the solvent. TMCS: hexane (3:7 vol%) solution was added, and for complete modification, the molar ratio of TMCS to Si was 4:1, and the modification temperature was 50 °C for 5 h. Finally, the gels were dried in an oven, and hydrophobic silica aerogels were obtained after drying at 60, 80, and 120 °C for 2 h by gradient temperature increase, respectively. Calcination in air at 500 °C for 2 h was used to remove the hydrophobic methyl groups in the silica aerogel structure.

### **S1.3 Synthesis of Zn-CsPbBr<sub>3</sub>@SiO<sub>2</sub> (ZB) composites**

1 mmol CsBr, x mmol PbBr<sub>2</sub>, and 1-x mmol ZnBr<sub>2</sub> were mixed, followed by adding silica aerogel of the same mass as the template. The mixture was thoroughly ground and blended in a mortar. Subsequently, the homogeneous mixture was transferred to a muffle furnace and calcined at 600 °C for 20 min, with a heating rate of 5 °C/min. After cooling to room temperature, the product was washed three times with deionized water and ethanol. The precipitate was then collected via centrifugation for 5 min and dried in a vacuum oven at 60 °C. Finally, the ZB composite was obtained through fine grinding of the dried powder. The detailed sample names and precursor quantities are listed in Table S1.

### **S1.4 Synthesis of Zn-CsPbBrI<sub>2</sub>@SiO<sub>2</sub> (ZBI) Composites**

1 mmol CsBr, 0.5 mmol PbI<sub>2</sub>, x mmol PbBr<sub>2</sub>, and 0.5-x mmol ZnBr<sub>2</sub> were mixed, followed by adding silica aerogel of the same mass as the template. The mixture was thoroughly ground and blended in a mortar. The homogeneous mixture was then transferred to a covered porcelain boat and placed in a tube furnace filled with nitrogen gas. It was calcined at 750 °C for 30 min at a heating rate of 10 °C/min. Upon reaching 750 °C, all gas valves were closed. After natural cooling, the sample was washed several times with DMF and centrifuged. The precipitate was then dried in a vacuum oven at 30 °C. Finally, the ZBI composite was obtained through fine grinding of the dried powder. Detailed sample names and precursor quantities are listed in Table S2

### **S1.5 Fabrication of LSCs**

Single-interlayer LSCs were prepared as shown in Figure 1. Initially, various masses of ZB/ZBI composites, PDMS curing agent, and DCM were weighed and mixed in a reagent bottle. This mixture was stirred for 30 min and then ultrasonicated for another 30 min to pre-disperse the composite powder in the solution. Subsequently, a specific amount of PDMS host agent was added to the mixture, which was then stirred for 1 hour. During this process, the DCM evaporated, allowing the powder to be completely and uniformly dispersed. The resulting suspension was weighed (100-110 mg) onto a glass substrate (25 × 25 × 1.5 mm<sup>3</sup>) using an electronic balance. The mixture was allowed to flow naturally until the mixture fully covered the substrate, after which it was placed under vacuum to eliminate air bubbles. A second glass plate (25 × 25 × 0.3 mm<sup>3</sup>) was then placed on top. The laminates were subsequently heat-cured for 1 min on a hot stage at 120 °C, resulting in single-interlayer LSCs based on ZB/PDMS and

ZBI/PDMS. The thickness of the fluorescent layer was controlled to be 0.2 mm, and the total thickness of the LSCs was approximately 2.0 mm. The detailed dosage of each component are shown in the Table S3.

Preparation of Overall curing LSCs. Generally, a mixture of various masses fractions of ZB/ZBI composite, PDMS, and curing agent (in a mass ratio of 10:1) was prepared. To obtain a homogeneous suspension, the mixture was thoroughly stirred, sonicated, and vacuumed for 1 hour to remove internal air bubbles. The mixtures were then placed in a mold and cured at 60 °C for 3 h. The resulting product was the overall cured LSC. The detailed dosage of each component are shown in Supplementary Table S4.

The multi-interlayer LSCs were prepared using the single-interlayer LSCs preparation method. A glass substrate ( $25 \times 25 \times 1 \text{ mm}^3$ ) was chosen as the base layer and drop-coated with 100–110 mg of a ZBI/PDMS mixture (14.0 wt%). This was then covered with another glass plate ( $25 \times 25 \times 0.3 \text{ mm}^3$ ). After thermal curing, a series of ZB/PDMS mixtures (0.5%-14.0 wt%) were drop-coated and covered with additional glass plates ( $25 \times 25 \times 0.3 \text{ mm}^3$ ), followed by thermal curing at 120 °C for 1 min. Multi-interlayer LSCs were obtained by controlling the thickness of the fluorescent layer in each layer to 0.2 mm and the total thickness to 2.0 mm.

## S2 Characterization

The size and morphology of ZB and ZBI composites were characterized by the high-resolution field-emission transmission electron microscope (HRTEM) on Talos F200X (FEI, Czech). The crystal structure information of the samples was obtained using an X-ray diffraction (XRD) spectrometer on a Bruker D8 phaser with Cu Ka radiation ( $\lambda = 1.5406 \text{ \AA}$ ) at angles ranging from 10 to 60°. The elemental analysis was carried out through X-ray photoelectron spectroscopy (XPS) (PHOIBOS150, Germany). The PL excitation and emission spectra of dendritic  $\text{CsPbBr}_3@SiO_2$  particles were collected via the fluorescent spectrometer (RF-6000, Shimadzu, Japan). The UV-Vis absorption spectra and transmittance spectra were recorded by an ultraviolet-visible-near infrared (UV-vis-NIR) spectrometer (UV-3600 Plus, Shimadzu, Japan). All fluorescence and reflectance spectra were recorded using a fluorescence spectrometer (QE65PRO-FL, Ocean Optics Inc.) and a fiber optic spectrometer (USB4000, Ocean Optics Inc.), respectively. All photographs of LSCs in visible and UV light were taken with a regular camera. The steady-state photoluminescence (PL) and time-resolved photoluminescence (TRPL) (under 375 or 420nm excitation) were obtained by DW-PLE03 (Fluo Time 300). The current density–voltage ( $J$ - $V$ ) curves of the silicon solar cell were measured by a source meter (Keithley 2400, USA) under simulated AM 1.5 G (100 mW/cm<sup>2</sup> irradiance) provided by a solar simulator (Newport Oriel Sol 3A Class AAA, 64023A). Silicon solar cells ( $V_{oc}$ : 0.54 V,  $J_{sc}$ : 30 mA/cm<sup>2</sup>, PCE: 11% (active area: 0.5 cm<sup>2</sup>), EQE: 15% at 510 nm) are purchased from Ningbo Angui Electronics Co., ltd. Most of the surface area of the silicon solar cell was covered by matte black tape, with the exposed area being strictly the same as the edge area of the LSC. The PLQY and edge-emission efficiency ( $\eta_{edge}$ ) of all the LSCs were obtained on a fluorescence spectrophotometer (Ocean Optics QE65PRO-FL) with a calibrated integrating sphere.

The external optical efficiency ( $\eta_{opt}$ ) can be calculated by using the following equation:

$$\eta_{opt} = \frac{I_{LSC}}{I_{PV} \times G}$$

where  $I_{LSC}$  is the short circuit current from a cell attached to the LSC and  $I_{PV}$  is the short circuit current measured for the same solar cell under direct illumination with the same light source.  $G$  is the ratio of the top surface area ( $A_{top}$ ) relative to the edge surface area ( $A_{edge}$ ) of the LSCs.

A majority of the surface area of the silicon solar cell was covered by a black tape and the left surface area of the solar cell is strictly the same as one edge area of the LSCs for measurement of optical efficiency.

$\eta_{int}$  is defined as the ratio between the number of photons emitted at the edge of the LSC and the number of absorbed incident photons, calculated by the following equation<sup>2</sup>:

$$\eta_{int} = \frac{I_{edge}}{I_{abs}} \times \eta_{edge}$$

$\eta_{ext}$  is defined as the ratio between the number of photons emitted at the edge of the LSC and the total number of incident photons, calculated by the following equation<sup>3</sup>:

$$\eta_{ext} = \eta_{int} \times \eta_{abs}$$

where  $\eta_{abs}$  is the absorption factor of LSC at the incident light wavelength, which can be calculated using the following equation:

$$\eta_{abs} = (1 - R) \times (1 - 10^{-OD})$$

R is the reflectance at the incidence light wavelength and OD is the optical density

at the specific wavelength.

The overall power conversion efficiency ( $\eta_{PCE}$ ) is calculated by the following equation<sup>4</sup>:

$$\eta_{PCE} = \frac{I_{SC} \times V_{OC} \times FF}{P_{in} \times A_{LSC}}$$

where  $I_{SC}$  is the short current,  $V_{oc}$  is the open circuit voltage,  $FF$  is the fill factor,  $P_{in}$  is AM1.5G,  $A_{LSC}$  is the LSC top surface.



### S3 Figures and tables

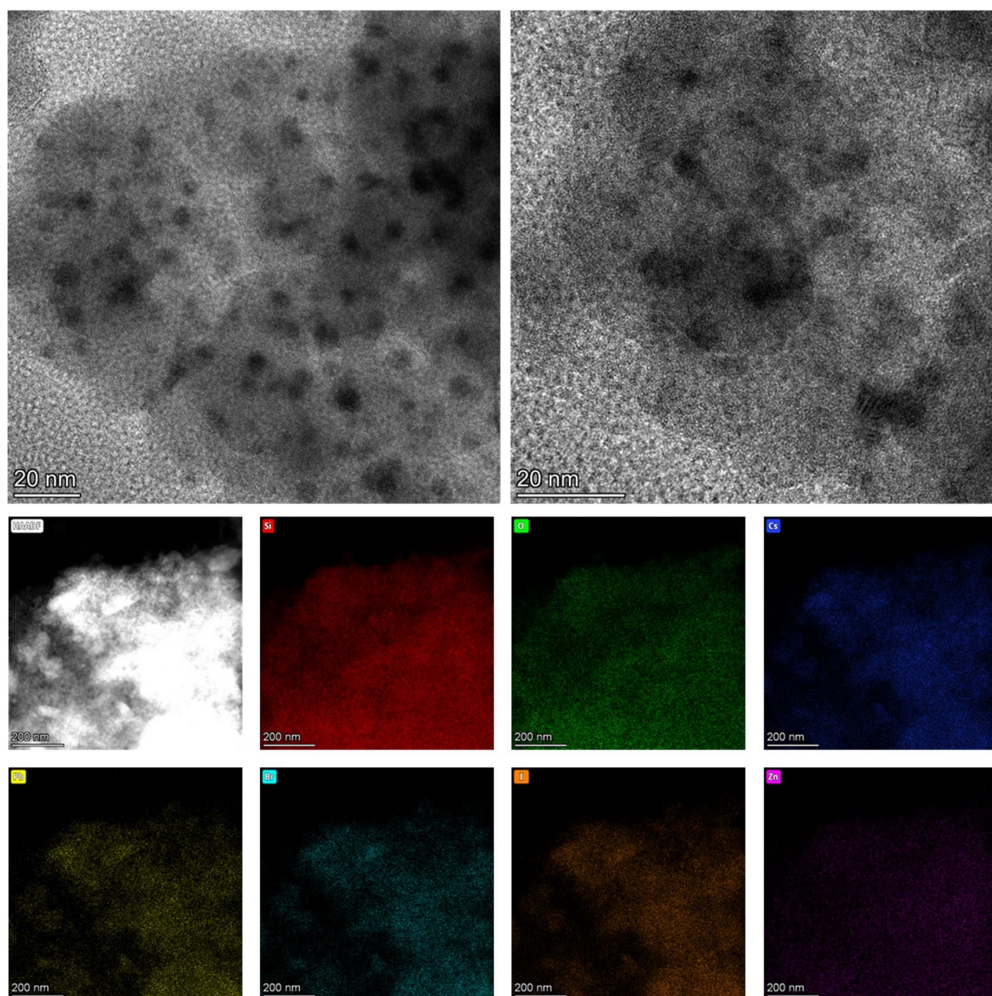

**Figure S1.** HRTEM image of Zn-CsPbBr<sub>2</sub>@SiO<sub>2</sub> composites and HAADF-STEM image of Zn-CsPbBr<sub>2</sub>@SiO<sub>2</sub> composites and distribution of Si, O, Cs, Pb, Br, I, Zn elemental mapping in the corresponding region.

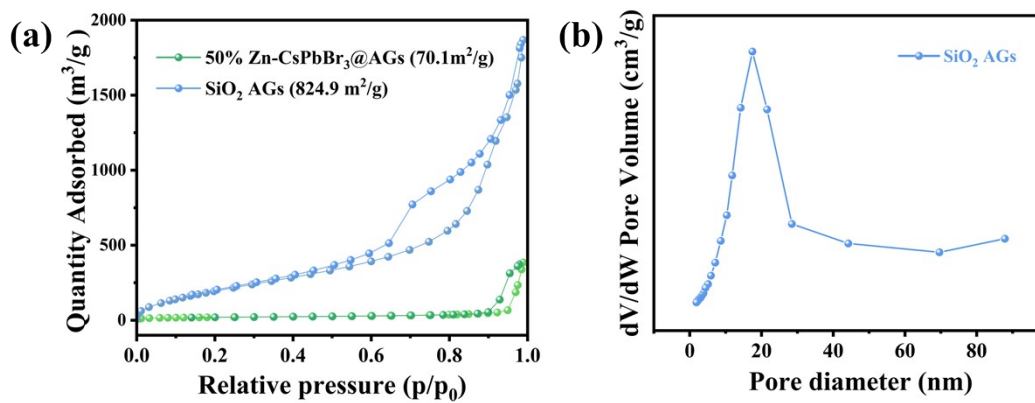

**Figure S2.** (a) N<sub>2</sub> adsorption–desorption isotherms, (b) the pore size distributions of the AGs.

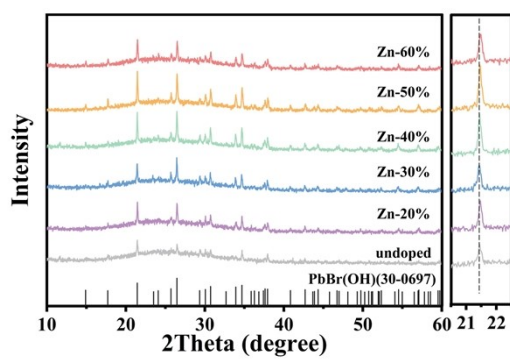

**Figure S3.** XRD of Zn-CspbBr<sub>3</sub>@SiO<sub>2</sub> composites at different Zn<sup>2+</sup> ion doping concentrations.

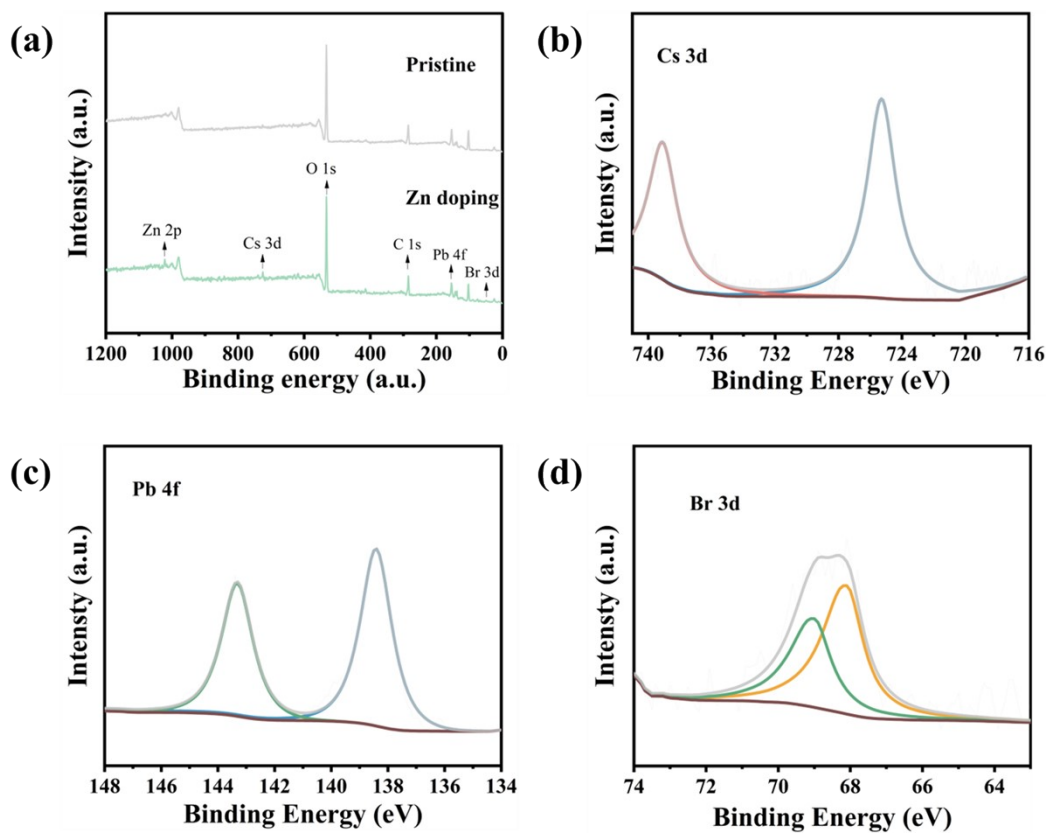

**Figure S4.** (a) XPS full survey spectrum of the Zn-CsPbBr<sub>3</sub>@SiO<sub>2</sub> composites. The high-resolution XPS spectra for 50% Zn-CsPbBr<sub>3</sub>@SiO<sub>2</sub> composites. (b) Cs 3d, (c) Pb 4f, (d) Br 3d.

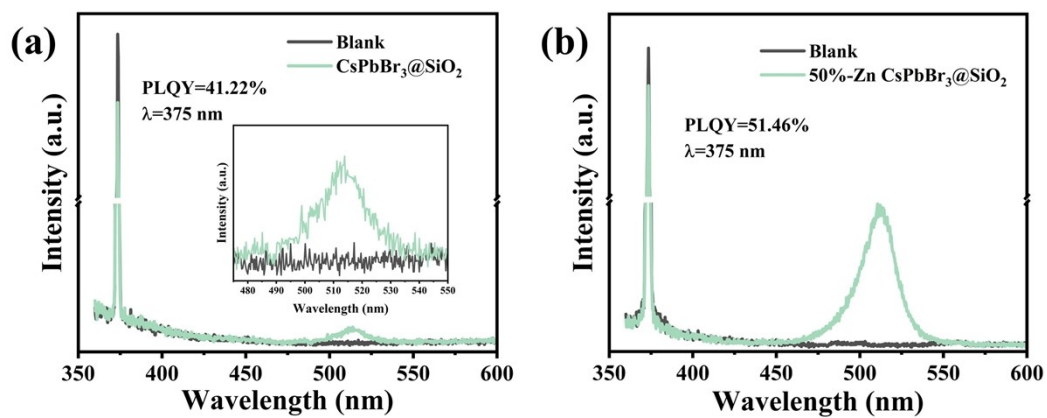

Figure S5. PLQY of undoped (a) and 50% Zn-CsPbBr<sub>3</sub>@SiO<sub>2</sub> composites (b).

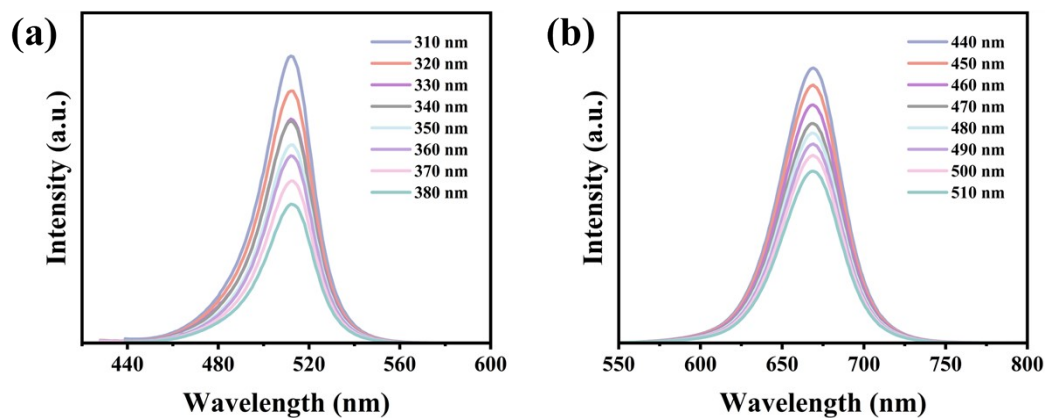

**Figure S6.** (a) PL spectra of 50% Zn-CsPbBr<sub>3</sub>@SiO<sub>2</sub> at various excitation wavelengths.

(b) PL spectra of 50% Zn-CsPbBr<sub>2</sub>@SiO<sub>2</sub> at various excitation wavelengths.

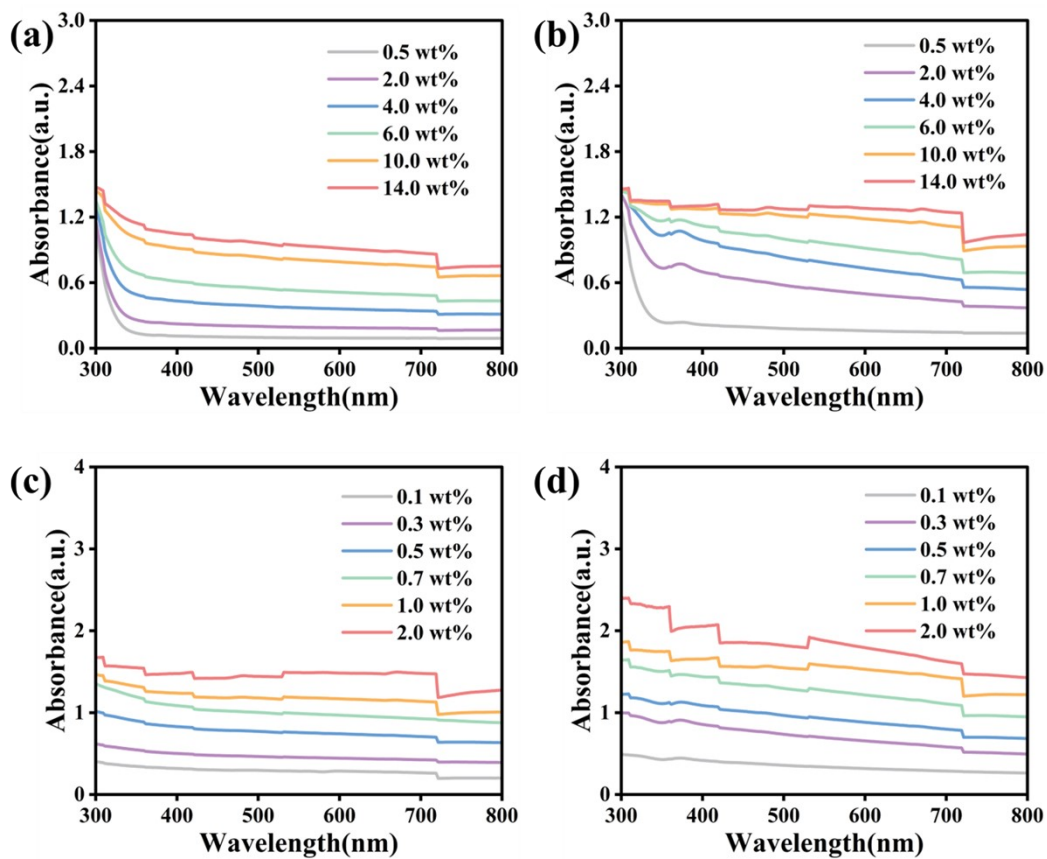

**Figure S7.** (a-b) Absorption spectra of single-interlayer LSCs with different ZB/ZBI concentrations, respectively. (c-d) PL spectra of overall curing LSCs with different ZB/ZBI concentrations, respectively.

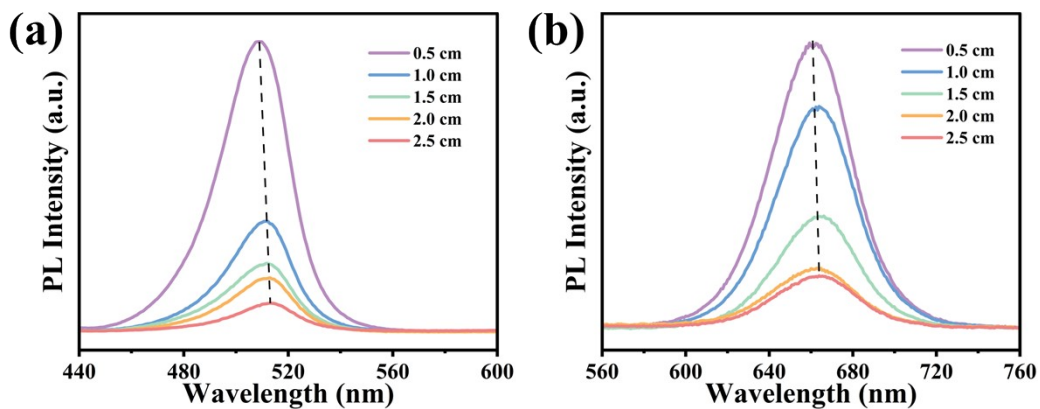

**Figure S8.** PL spectra of (a)  $\text{Zn-CsPbBr}_3@SiO_2$  and (b)  $\text{Zn-CsPbBrI}_2@SiO_2$  of single-interlayer LSCs were measured at different optical intervals ( $L=0.5, 1.0, 1.5, 2.0$  and  $2.5$  cm).

The distance ( $L$ ) was defined as the distance between the excitation spot on the LSC and the edge of the LSC.



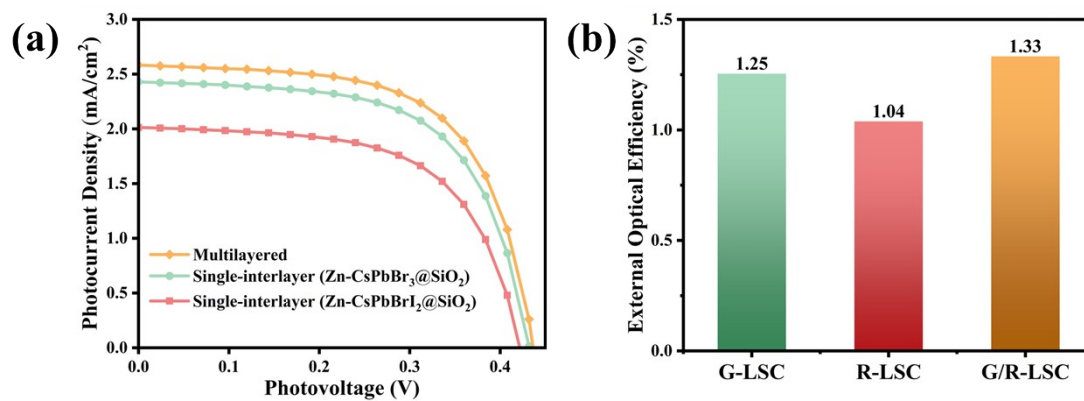

**Figure S9.** (a) The current density-voltage ( $J$ - $V$ ) curves of large-area single interlayer LSCs and multi-interlayer LSCs ( $50 \times 50 \times 2 \text{ mm}^3$ ) based on ZB/ZBI complexes at a concentration of 4.0 wt%. (b) The corresponding external optical efficiency histograms.

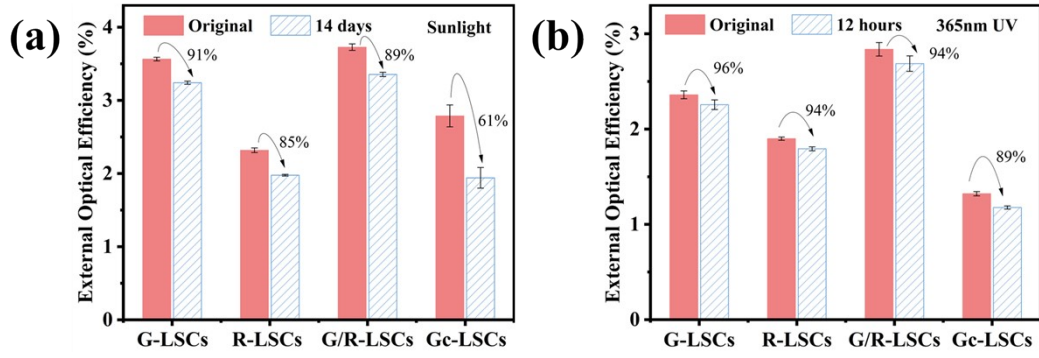

**Figure S10.**  $\eta_{opt}$  of different types of LSCs before and after 14 days of exposure to (a) natural sunlight and 12 hours of exposure to (b) 365 nm UV light.

**Table S1.** Molar ratios of proportional precursors at different doping levels for Zn-CsPbBr<sub>3</sub>@SiO<sub>2</sub> composites.

| <b>Mixing ratio</b> | <b>CsBr</b> | <b>PbBr<sub>2</sub></b> | <b>ZnBr<sub>2</sub></b> |
|---------------------|-------------|-------------------------|-------------------------|
| <b>0%</b>           | 1           | 1                       | --                      |
| <b>20%</b>          | 1           | 0.8                     | 0.2                     |
| <b>40%</b>          | 1           | 0.6                     | 0.4                     |
| <b>50%</b>          | 1           | 0.5                     | 0.5                     |
| <b>60%</b>          | 1           | 0.4                     | 0.6                     |

**Table S2.** Molar ratios of proportional precursors at different doping levels for Zn-CsPbBrI<sub>2</sub>@SiO<sub>2</sub> composites.

| <b>Mixing ratio</b> | <b>CsI</b> | <b>PbI<sub>2</sub></b> | <b>PbBr<sub>2</sub></b> | <b>ZnBr<sub>2</sub></b> | <b>ZnI<sub>2</sub></b> |
|---------------------|------------|------------------------|-------------------------|-------------------------|------------------------|
| <b>0%</b>           | 1          | 0.5                    | 0.5                     | --                      | --                     |
| <b>20%</b>          | 1          | 0.5                    | 0.3                     | 0.2                     | --                     |
| <b>40%</b>          | 1          | 0.5                    | 0.1                     | 0.4                     | --                     |
| <b>50%</b>          | 1          | 0.5                    | --                      | 0.5                     | --                     |
| <b>60%</b>          | 1          | --                     | 0.4                     | 0.1                     | 0.5                    |

**Table S3.** The preparation formula of single-interlayer LSCs.

| <b>Content of ZB/ZBI composites</b> | <b>PDMS Sylgard 184 (mg)</b> | <b>curing agent (mg)</b> | <b>ZB/ZBI composite (mg)</b> | <b>DCM (<math>\mu</math>L)</b> |
|-------------------------------------|------------------------------|--------------------------|------------------------------|--------------------------------|
| <b>0.5 wt%</b>                      | 500                          | 50                       | 2.5                          | 250                            |
| <b>2.0 wt%</b>                      | 500                          | 50                       | 10                           | 250                            |
| <b>4.0 wt%</b>                      | 500                          | 50                       | 20                           | 250                            |
| <b>6.0 wt%</b>                      | 500                          | 50                       | 30                           | 250                            |
| <b>10.0 wt%</b>                     | 500                          | 50                       | 50                           | 250                            |
| <b>14.0 wt%</b>                     | 500                          | 50                       | 70                           | 250                            |

**Table S4.** The preparation formula of overall-curing LSCs.

| <b>Content of ZB/ZBI composites</b> | <b>PDMS Sylgard 184 (mg)</b> | <b>curing agent (mg)</b> | <b>ZB/ZBI composite (mg)</b> | <b>DCM (<math>\mu</math>L)</b> |
|-------------------------------------|------------------------------|--------------------------|------------------------------|--------------------------------|
| <b>0.1 wt%</b>                      | 2500                         | 250                      | 2.5                          | 250                            |
| <b>0.3 wt%</b>                      | 2500                         | 250                      | 7.5                          | 250                            |
| <b>0.5 wt%</b>                      | 2500                         | 250                      | 12.5                         | 250                            |
| <b>0.7 wt%</b>                      | 2500                         | 250                      | 17.5                         | 250                            |
| <b>1.0 wt%</b>                      | 2500                         | 250                      | 25                           | 250                            |
| <b>2.0 wt%</b>                      | 2500                         | 250                      | 50                           | 250                            |

**Table S5.** Lifetime data of Zn-CsPbBr<sub>3</sub>@SiO<sub>2</sub> composite (under 375 nm excitation) and Zn-CsPbBrI<sub>2</sub>@SiO<sub>2</sub> composite (under 420 nm excitation).

|                                                       | $\lambda_{ex}$<br>(nm) | $A_1$ | $\tau_1$<br>(ns) | $A_2$ | $\tau_2$<br>(ns) | $A_3$ | $T_3$<br>(ns) | $\tau_{avg}$<br>(ns) | $\chi^2$ |
|-------------------------------------------------------|------------------------|-------|------------------|-------|------------------|-------|---------------|----------------------|----------|
| <b>CsPbBr<sub>3</sub>@SiO<sub>2</sub></b>             | 375.00                 | 0.32  | 25.63            | 0.65  | 6.75             | 0.06  | 132.39        | 62.40                | 0.999    |
| <b>50%Zn-<br/>CsPbBr<sub>3</sub>@SiO<sub>2</sub></b>  | 375.00                 | 1.01  | 5.21             | 0.58  | 14.19            | 0.07  | 60.02         | 75.55                | 0.999    |
| <b>CsPbBrI<sub>2</sub>@SiO<sub>2</sub></b>            | 420.00                 | 1.25  | 3.87             | 0.45  | 23.38            | 0.09  | 147.17        | 22.32                | 0.998    |
| <b>50%Zn-<br/>CsPbBrI<sub>2</sub>@SiO<sub>2</sub></b> | 420.00                 | 0.77  | 4.97             | 0.59  | 19.02            | 0.14  | 63.14         | 33.15                | 0.999    |

**Table S6.** Photovoltaic parameters of single-interlayer LSCs with different concentrations of ZB composites.

|                 | $J_{sc}(mA/cm^2)$ | $V_{oc}(V)$ | $FF(\%)$ | $G$   | $\eta_{opt}(\%)$ | $C$  | $\eta_{PCE}(\%)$ |
|-----------------|-------------------|-------------|----------|-------|------------------|------|------------------|
| <b>0.5 wt%</b>  | 1.52              | 0.43        | 59.74    | 3.125 | 1.567            | 0.05 | 0.126            |
| <b>2.0 wt%</b>  | 2.25              | 0.45        | 63.01    | 3.125 | 2.326            | 0.07 | 0.204            |
| <b>4.0 wt%</b>  | 2.93              | 0.46        | 64.85    | 3.125 | 3.029            | 0.09 | 0.281            |
| <b>6.0 wt%</b>  | 3.36              | 0.47        | 65.78    | 3.125 | 3.465            | 0.11 | 0.329            |
| <b>10.0 wt%</b> | 3.87              | 0.47        | 65.93    | 3.125 | 3.997            | 0.12 | 0.382            |
| <b>14.0 wt%</b> | 4.22              | 0.47        | 66.23    | 3.125 | 4.357            | 0.14 | 0.423            |



**Table S7.** Photovoltaic parameters of single-interlayer LSCs with different concentrations of ZBI composite.

|                 | $J_{sc}(mA/cm^2)$ | $V_{oc}(V)$ | $FF(\%)$ | $G$   | $\eta_{opt}(\%)$ | $C$  | $\eta_{PCE}(\%)$ |
|-----------------|-------------------|-------------|----------|-------|------------------|------|------------------|
| <b>0.5 wt%</b>  | 1.31              | 0.42        | 57.98    | 3.125 | 1.353            | 0.04 | 0.101            |
| <b>2.0 wt%</b>  | 1.99              | 0.44        | 61.57    | 3.125 | 2.054            | 0.06 | 0.172            |
| <b>4.0 wt%</b>  | 2.26              | 0.45        | 62.44    | 3.125 | 2.336            | 0.07 | 0.202            |
| <b>6.0 wt%</b>  | 2.60              | 0.46        | 63.64    | 3.125 | 2.682            | 0.08 | 0.241            |
| <b>10.0 wt%</b> | 3.10              | 0.46        | 64.72    | 3.125 | 3.204            | 0.10 | 0.297            |
| <b>14.0 wt%</b> | 3.49              | 0.47        | 65.97    | 3.125 | 3.605            | 0.11 | 0.346            |

**Table S8.** Photovoltaic parameters of overall curing LSCs with different concentrations of ZBI composite.

|                | $J_{sc}(mA/cm^2)$ | $V_{oc}(V)$ | $FF(\%)$ | $G$   | $\eta_{opt}(\%)$ | $C$  | $\eta_{PCE}(\%)$ |
|----------------|-------------------|-------------|----------|-------|------------------|------|------------------|
| <b>0.1 wt%</b> | 4.03              | 0.46        | 65.49    | 3.125 | 4.162            | 0.13 | 0.387            |
| <b>0.3 wt%</b> | 5.43              | 0.47        | 66.89    | 3.125 | 5.605            | 0.18 | 0.546            |
| <b>0.5 wt%</b> | 6.79              | 0.48        | 68.10    | 3.125 | 7.005            | 0.22 | 0.707            |
| <b>0.7 wt%</b> | 7.23              | 0.48        | 68.41    | 3.125 | 7.463            | 0.23 | 0.761            |
| <b>1.0 wt%</b> | 8.22              | 0.49        | 69.59    | 3.125 | 8.488            | 0.27 | 0.890            |
| <b>2.0 wt%</b> | 9.01              | 0.49        | 69.50    | 3.125 | 9.298            | 0.29 | 0.980            |

**Table S9.** Photovoltaic parameters of overall curing LSCs with different concentrations of ZBI composite.

|                | $J_{sc}(mA/cm^2)$ | $V_{oc}(V)$ | $FF(\%)$ | $G$   | $\eta_{opt}(\%)$ | $C$  | $\eta_{PCE}(\%)$ |
|----------------|-------------------|-------------|----------|-------|------------------|------|------------------|
| <b>0.1 wt%</b> | 2.49              | 0.44        | 63.11    | 3.125 | 2.574            | 0.08 | 0.220            |
| <b>0.3 wt%</b> | 3.43              | 0.45        | 65.18    | 3.125 | 3.541            | 0.11 | 0.323            |
| <b>0.5 wt%</b> | 4.04              | 0.46        | 65.69    | 3.125 | 4.165            | 0.13 | 0.389            |
| <b>0.7 wt%</b> | 4.68              | 0.46        | 66.58    | 3.125 | 4.826            | 0.15 | 0.462            |
| <b>1.0 wt%</b> | 5.14              | 0.47        | 67.34    | 3.125 | 5.310            | 0.17 | 0.519            |
| <b>2.0 wt%</b> | 5.79              | 0.47        | 67.14    | 3.125 | 5.972            | 0.19 | 0.585            |

**Table S10.** The optical efficiency of single-interlayer LSCs with different concentrations of ZB composite.

|                 | <b>PLQY(%)</b> | <b><math>\eta_{edge}(\%)</math></b> | <b><math>\eta_{int}(\%)</math></b> | <b><math>\eta_{abs}(\%)</math></b> | <b><math>\eta_{ext}(\%)</math></b> |
|-----------------|----------------|-------------------------------------|------------------------------------|------------------------------------|------------------------------------|
| <b>0.5 wt%</b>  | 49.31%         | 44.03%                              | 21.71%                             | 20.79%                             | 4.51%                              |
| <b>2.0 wt%</b>  | 61.88%         | 53.00%                              | 32.80%                             | 38.84%                             | 12.74%                             |
| <b>4.0 wt%</b>  | 78.96%         | 44.01%                              | 34.75%                             | 57.81%                             | 20.09%                             |
| <b>6.0 wt%</b>  | 80.50%         | 34.67%                              | 27.91%                             | 74.15%                             | 20.70%                             |
| <b>10.0 wt%</b> | 84.13%         | 27.10%                              | 22.80%                             | 83.82%                             | 19.11%                             |
| <b>14.0 wt%</b> | 92.70%         | 24.81%                              | 23.00%                             | 87.79%                             | 20.19%                             |

**Table S11.** The optical efficiency of single-interlayer LSCs with different concentrations of ZBI composite.

|                 | <b>PLQY(%)</b> | <b><math>\eta_{edge}(\%)</math></b> | <b><math>\eta_{int}(\%)</math></b> | <b><math>\eta_{abs}(\%)</math></b> | <b><math>\eta_{ext}(\%)</math></b> |
|-----------------|----------------|-------------------------------------|------------------------------------|------------------------------------|------------------------------------|
| <b>0.5 wt%</b>  | 50.68%         | 42.30%                              | 21.44%                             | 36.59%                             | 7.85%                              |
| <b>2.0 wt%</b>  | 48.96%         | 30.61%                              | 14.99%                             | 78.60%                             | 11.78%                             |
| <b>4.0 wt%</b>  | 44.94%         | 26.20%                              | 11.77%                             | 91.58%                             | 10.78%                             |
| <b>6.0 wt%</b>  | 46.05%         | 18.59%                              | 8.56%                              | 93.21%                             | 7.98%                              |
| <b>10.0 wt%</b> | 33.90%         | 14.23%                              | 4.82%                              | 94.98%                             | 4.58%                              |
| <b>14.0 wt%</b> | 33.30%         | 12.61%                              | 4.20%                              | 94.56%                             | 3.97%                              |

**Table S12.** The optical efficiency of overall curing LSCs with different concentrations of ZB composite.

|                | <b>PLQY(%)</b> | <b><math>\eta_{edge}(\%)</math></b> | <b><math>\eta_{int}(\%)</math></b> | <b><math>\eta_{abs}(\%)</math></b> | <b><math>\eta_{ext}(\%)</math></b> |
|----------------|----------------|-------------------------------------|------------------------------------|------------------------------------|------------------------------------|
| <b>0.1 wt%</b> | 52.68%         | 56.89%                              | 29.97%                             | 20.79%                             | 6.23%                              |
| <b>0.3 wt%</b> | 61.49%         | 52.16%                              | 32.07%                             | 38.84%                             | 12.46%                             |
| <b>0.5 wt%</b> | 83.63%         | 39.97%                              | 33.43%                             | 57.81%                             | 19.33%                             |
| <b>0.7 wt%</b> | 70.80%         | 35.74%                              | 25.31%                             | 74.15%                             | 18.77%                             |
| <b>1.0 wt%</b> | 73.48%         | 29.25%                              | 21.49%                             | 83.82%                             | 18.02%                             |
| <b>2.0 wt%</b> | 76.54%         | 26.20%                              | 20.05%                             | 87.79%                             | 17.60%                             |

**Table S13.** The optical efficiency of overall curing LSCs with different concentrations of ZBI composite.

|                | <b>PLQY(%)</b> | <b><math>\eta_{edge}(\%)</math></b> | <b><math>\eta_{int}(\%)</math></b> | <b><math>\eta_{abs}(\%)</math></b> | <b><math>\eta_{ext}(\%)</math></b> |
|----------------|----------------|-------------------------------------|------------------------------------|------------------------------------|------------------------------------|
| <b>0.1 wt%</b> | 35.68%         | 39.37%                              | 14.05%                             | 62.95%                             | 8.84%                              |
| <b>0.3 wt%</b> | 24.87%         | 35.64%                              | 8.86%                              | 86.15%                             | 7.63%                              |
| <b>0.5 wt%</b> | 24.44%         | 29.94%                              | 7.32%                              | 90.86%                             | 6.65%                              |
| <b>0.7 wt%</b> | 21.25%         | 25.55%                              | 5.43%                              | 92.81%                             | 5.04%                              |
| <b>1.0 wt%</b> | 20.63%         | 26.45%                              | 5.46%                              | 93.05%                             | 5.08%                              |
| <b>2.0 wt%</b> | 15.83%         | 12.21%                              | 1.93%                              | 93.45%                             | 1.81%                              |

**Table S14.** The  $\eta_{\text{opt}}$  for LSCs with different luminophores, waveguides, and dimensions.

| Luminophore                                                   | Waveguide | Dimensions<br>(cm <sup>3</sup> ) | $\eta_{\text{opt}}$<br>(%) | Ref.      |
|---------------------------------------------------------------|-----------|----------------------------------|----------------------------|-----------|
| CsPbBr <sub>3</sub> QDs                                       | EVA       | 2.5 × 2.5 × 0.2                  | 1.66                       | 5         |
| CsPbI <sub>3</sub> QDs                                        | EVA       | 2.5 × 2.5 × 0.2                  | 2.14                       | 5         |
| CsPb(Br <sub>x</sub> I <sub>1-x</sub> ) <sub>3</sub>          | PLMA-EGDA | 9 × 1.3 × 0.2                    | 2                          | 6         |
| Cs <sub>4</sub> PbBr <sub>6</sub> NCs                         | PS        | 10 × 10 × 0.4                    | 2.4                        | 7         |
| CsPb(Br <sub>0.2</sub> I <sub>0.8</sub> ) <sub>3</sub> NCs    | PLMA-EGDA | 10 × 10 × 0.2                    | 2.4                        | 8         |
| Yb <sup>3+</sup> -doped CsPbCl <sub>3</sub>                   | PMMA      | 5 × 5 × 0.2                      | 3.7                        | 9         |
| Mn <sup>2+</sup> -CsPbCl <sub>3</sub> NCs                     | PMMA      | 20 × 20 × 0.5                    | 0.9                        | 10        |
| CsPbBr <sub>3</sub> NCs                                       | Glass     | 2 × 2 × 0.11                     | 6.17                       | 11        |
| CsPbX <sub>3</sub> (laminated)                                | PLMA/PMMA | 5 × 5 × 0.7                      | 4.97                       | 12        |
| Zn-CsPbBr <sub>3</sub> @SiO <sub>2</sub>                      | PDMS      | 2.5 × 2.5 × 0.2                  | 4.36                       | This work |
| Zn-CsPbBrI <sub>2</sub> @SiO <sub>2</sub>                     | PDMS      | 2.5 × 2.5 × 0.2                  | 3.61                       | This work |
| CsPbX <sub>3</sub> @SiO <sub>2</sub><br>(tandem)              | PDMS      | 2.5 × 2.5 × 0.2                  | 4.72                       | This work |
| Zn-CsPbBr <sub>3</sub> @SiO <sub>2</sub><br>(overall curing)  | PDMS      | 2.5 × 2.5 × 0.2                  | 9.38                       | This work |
| Zn-CsPbBrI <sub>2</sub> @SiO <sub>2</sub><br>(overall curing) | PDMS      | 2.5 × 2.5 × 0.2                  | 5.97                       | This work |



## Reference

- 1 Y. Du, X. Zhang, J. Wang, Z. Liu, K. Zhang, X. Ji, Y. You and X. Zhang, *ACS Nano*, 2020, **14**, 11919–11928.
- 2 M. G. Debije, R. C. Evans and G. Griffini, *Energy Environ Sci*, 2021, **14**, 293–301.
- 3 T. Wei, L. Wang, C. Sun, D. Xu, J. Tao, H. Zhang, J. Han, C. Fan, Z. Zhang and W. Bi, *ACS Appl. Mater. Interfaces*, 2021, **13**, 56348–56357.
- 4 S. Castelletto and A. Boretto, *Nano Energy*, 2023, **109**, 108269.
- 5 C. Cai, M. Wang, J. Wang, B. Xu, J. Wang, L. Zhang, W. Xin, L. Xue, J. Li and X. Wang, *Appl. Surf. Sci.*, 2023, **609**, 155313.
- 6 H. Zhao, Y. Zhou, D. Benetti, D. Ma and F. Rosei, *Nano Energy*, 2017, **37**, 214–223.
- 7 H. Zhao, R. Sun, Z. Wang, K. Fu, X. Hu and Y. Zhang, *Adv. Funct. Mater.*, 2019, **29**, 1902262.
- 8 H. Zhao, D. Benetti, X. Tong, H. Zhang, Y. Zhou, G. Liu, D. Ma, S. Sun, Z. M. Wang, Y. Wang and F. Rosei, *Nano Energy*, 2018, **50**, 756–765.
- 9 X. Zuo, K. Chang, J. Zhao, Z. Xie, H. Tang, B. Li and Z. Chang, *J. Mater. Chem.A*, 2016, **4**, 51–58.
- 10 F. Meinardi, Q. A. Akkerman, F. Bruni, S. Park, M. Mauri, Z. Dang, L. Manna and S. Brovelli, *ACS Energy Lett.*, 2017, **2**, 2368–2377.
- 11 Y. Zhang, W. Zhang, Y. Ye, K. Li, X. Gong and C. Liu, *Sol. Energy Mater. Sol. Cells*, 2022, **238**, 111619.
- 12 X. Liu, D. Benetti, J. Liu, L. Jin and F. Rosei, *Nano Energy*, 2023, **111**, 108438.
